# Supplementary material for: Training general practitioners in the ABC versus 5As method of delivering stop-smoking advice: a pragmatic, two-arm cluster randomised controlled trial
Source: PubMed Central journal article supplement — ERJ Open Res. 2021 Jul 26;7(3):00621-2020. doi: 10.1183/23120541.00621-2020 (PMC8311138; doi:10.1183/23120541.00621-2020), 2021-07-26
Supplement: 00621-2020.tableS1.pdf [file 00621-2020.tableS1.pdf]

**Table S1: Changes in capability, opportunity and motivation to deliver brief stop-smoking advice to smoking patients from prior to following the training reported by 69 general practitioners (GPs) of 52 GP practices.**

|                    |                                                                                                                                                      | Baseline score <sup>a</sup> , mean ± SD | Baseline score <sup>a</sup> , median (IQR) | Follow-up score <sup>a</sup> , mean ± SD | Follow-up score <sup>a</sup> , median (IQR) | Mean difference (MD) | z-score  | Number of cases | Effect size, d <sup>b</sup> |
|--------------------|------------------------------------------------------------------------------------------------------------------------------------------------------|-----------------------------------------|--------------------------------------------|------------------------------------------|---------------------------------------------|----------------------|----------|-----------------|-----------------------------|
| <b>Capability</b>  | • Brief smoking cessation advice given in a primary care setting increases the chance on tobacco abstinence of the patients (Question (Q): 4.2/1.2)  | 4.03 ± 0.91                             | 4 (2)                                      | 4.71 ± 0.49                              | 5 (1)                                       | 0.68                 | 5.127*** | 69              | 0.75                        |
|                    | • It is helpful to confront smoking patients repeatedly with their smoking habits and the advice to stop smoking (Q: 4.3/1.3)                        | 4.19 ± 0.91                             | 4 (2)                                      | 4.72 ± 0.63                              | 5 (1)                                       | 0.53                 | 4.441*** | 69              | 0.58                        |
|                    | • I do know the steps of a structured brief smoking cessation advice given in a primary care setting according to the 5A/ABC method (Q: 4.4/1.4)     | 1.88 ± 1.00                             | 2 (1)                                      | 4.72 ± 0.48                              | 5 (1)                                       | 2.84                 | 7.116*** | 69              | 2.84                        |
|                    | • A structured brief smoking cessation advice given in a primary care setting according to the 5A/ABC method takes less than 15 minutes (Q: 4.5/1.5) | 3.39 ± 1.06                             | 4 (1)                                      | 4.65 ± 0.56                              | 5 (1)                                       | 1.26                 | 5.212*** | 49 <sup>c</sup> | 1.19                        |
|                    | • I have the necessary skills to address patients smoking behavior adequately (Q: 5.1/2.1)                                                           | 3.35 ± 0.98                             | 3 (1)                                      | 4.20 ± 0.72                              | 4 (1)                                       | 0.85                 | 5.222*** | 69              | 0.87                        |
|                    | • I have the necessary skills to provide structured brief smoking cessation advice according to the “5A/ABC method” (Q:5.3/2.2)                      | 2.11 ± 1.04                             | 2 (1)                                      | 4.28 ± 0.66                              | 4 (1)                                       | 2.17                 | 6.705*** | 64              | 2.09                        |
| <b>Opportunity</b> | • The provision of structured brief smoking cessation advice (according to the “5A/ABC method”) is feasible in my daily practice (Q: 6.3/3.3)        | 3.78 ± 0.86                             | 4 (1)                                      | 4.47 ± 0.66                              | 5 (1)                                       | 0.69                 | 4.888*** | 68              | 0.80                        |
| <b>Motivation</b>  | • Tobacco smoking and smoking cessation are important issues in a general practice (Q: 6.1/3.1)                                                      | 4.65 ± 0.54                             | 5 (1)                                      | 4.72 ± 0.48                              | 5 (1)                                       | 0.07                 | 0.894    | 68              | 0.13                        |
|                    | • As a GP, I do have an important role in smoking cessation treatment of patients (Q: 6.2/3.2)                                                       | 4.59 ± 0.73                             | 5 (1)                                      | 4.69 ± 0.50                              | 5 (1)                                       | 0.10                 | 0.798    | 68              | 0.14                        |

The non-parametric Wilcoxon signed-rank test was used to compare baseline and follow-up scores; SD = standard deviation, IQR = interquartile range, GP = general practitioner, Q = question number in the respective questionnaire prior to/following the training; \*\*\*p < 0.001; <sup>a</sup>scores: 1 = totally disagree, 2 = partly disagree, 3 = partly agree, 4 = agree, 5 = totally agree; <sup>b</sup>Cohens d calculated with (Follow-up Mean – Baseline Mean) / Baseline SD (d ≥ 0.8 = large effect); <sup>c</sup>missing cases result from GPs that answered “I do not know the (respective) method”.
