# Supplementary material for: Training general practitioners in the ABC versus 5As method of delivering stop-smoking advice: a pragmatic, two-arm cluster randomised controlled trial
Source: PubMed Central journal article supplement — ERJ Open Res. 2021 Jul 26;7(3):00621-2020. doi: 10.1183/23120541.00621-2020 (PMC8311138; doi:10.1183/23120541.00621-2020), 2021-07-26
Supplement: 00621-2020.tableS2.pdf [file 00621-2020.tableS2.pdf]

**Table S2: Relevance of the training content and learning curve reported by general practitioners (GPs) directly following the training (N=69 GPs from 52 practices).**

|                                                                                                                                                                                     | % (n)      | Score,<br>mean $\pm$ SD |
|-------------------------------------------------------------------------------------------------------------------------------------------------------------------------------------|------------|-------------------------|
| <b>How do you estimate your learning growth achieved throughout the training? (Question (Q): 2.4)<sup>a</sup></b>                                                                   |            | 4.12 $\pm$ 0.74         |
| Very high                                                                                                                                                                           | 31.9% (22) |                         |
| High                                                                                                                                                                                | 47.8% (33) |                         |
| Medium                                                                                                                                                                              | 17.4% (12) |                         |
| Small                                                                                                                                                                               | 1.4% (1)   |                         |
| Very small                                                                                                                                                                          | 0% (0)     |                         |
| N/A                                                                                                                                                                                 | 1.4% (1)   |                         |
| <b>The relevance of the training content for daily GP practice became apparent (Q: 2.3)<sup>b</sup></b>                                                                             |            | 4.60 $\pm$ 0.67         |
| Totally Agree                                                                                                                                                                       | 65.2% (45) |                         |
| Agree                                                                                                                                                                               | 30.4% (21) |                         |
| Partly Agree                                                                                                                                                                        | 1.5% (1)   |                         |
| Disagree                                                                                                                                                                            | 0% (0)     |                         |
| Totally disagree                                                                                                                                                                    | 1.5% (1)   |                         |
| N/A                                                                                                                                                                                 | 1.5% (1)   |                         |
| <b>I plan to implement the structured brief smoking cessation advice according to the "ABC"/"5A" method more frequently in my daily practice in the future (Q: 3.4)<sup>b</sup></b> |            | 4.56 $\pm$ 0.63         |
| Totally Agree                                                                                                                                                                       | 62.3% (43) |                         |
| Agree                                                                                                                                                                               | 29.0% (20) |                         |
| Partly Agree                                                                                                                                                                        | 7.2% (5)   |                         |
| Disagree                                                                                                                                                                            | 0% (0)     |                         |
| Totally disagree                                                                                                                                                                    | 0% (0)     |                         |
| N/A                                                                                                                                                                                 | 1.4% (1)   |                         |

Data are presented as proportions %; N/A= no answer, SD = standard deviation, Q= question number in the respective questionnaire following the training; <sup>a</sup>scores: 1 = very small, 2 = small, 3 = medium, 4 = high, 5 = very high; <sup>b</sup>scores: 1= totally disagree, 2= partly disagree, 3= partly agree, 4= agree, 5= totally agree.
